# Supplementary material
Source: Royal Society of Chemistry journal article supplement (doi:10.1039/d6ma00528d)
Supplement: d6ma00528d1.pdf [file d6ma00528d1.pdf]

## Supporting Information

### Modulation of oxygen vacancies influences electrocatalytic performance of Ni-doped Ceria for oxygen and hydrogen evolution

Ajit Kumar Dhanka<sup>a</sup>, Mayank Tiwari<sup>b</sup>, Prashant K. Bhartiya<sup>b,c</sup>, Balaram Pani<sup>d</sup>, Avneesh Mittal<sup>e</sup>, Debabrata Mishra<sup>\*b</sup>, and Nityananda Agasti<sup>\*a</sup>

<sup>a</sup> Department of Chemistry, University of Delhi, North Campus, Delhi 110007, India

<sup>b</sup> Department of Physics and Astrophysics, University of Delhi, North Campus, Delhi 110007, India

<sup>c</sup> Delhi School of Climate Change and Sustainability, Institution of Eminence, University of Delhi, 110007

<sup>d</sup> Department of Chemistry, Bhashkaracharya College of Applied Sciences, University of Delhi, Dwarka, New Delhi, 110075, India.

<sup>e</sup> Department of Electronics, Bhashkaracharya College of Applied Sciences, University of Delhi, Dwarka, New Delhi, 110075, India.

## SUPPORTING INFORMATION CONTENT

### TABLE OF CONTENTS

| Sl. No. | Items | Description                                                                                                                                                                                                                                                         | Page No. |
|---------|-------|---------------------------------------------------------------------------------------------------------------------------------------------------------------------------------------------------------------------------------------------------------------------|----------|
| 1       | S1    | The shifting of UV-vis. absorption band of CeO <sub>2</sub> on Ni doping.                                                                                                                                                                                           | 3        |
| 2       | S2    | (a) Variation in intensity of peaks in XRD for CeO <sub>2</sub> and Ni-doped CeO <sub>2</sub> , (b) XRD pattern of Ni-doped CeO <sub>2</sub> with 14% Ni, and (c) zoom pattern of the peak corresponding to NiO appearing in Ni-doped CeO <sub>2</sub> with 14% Ni. | 3        |

|   |                 |                                                                                                                                                                                                                                                                                                                                 |   |
|---|-----------------|---------------------------------------------------------------------------------------------------------------------------------------------------------------------------------------------------------------------------------------------------------------------------------------------------------------------------------|---|
| 3 | <b>S3</b>       | (a) Variation in intensity, broadening, and shifting of Raman peaks and (b) the bands at $610\text{ cm}^{-1}$ correspond to the defect-induced mode (D) for $\text{CeO}_2$ and Ni-doped $\text{CeO}_2$ .                                                                                                                        | 4 |
| 4 | <b>S4</b>       | (a) and (b) the relative integral area Ce 3d, (c) and (d) the integral area of O 1s for $\text{CeO}_2$ and Ni/ $\text{CeO}_2$ .                                                                                                                                                                                                 | 5 |
| 5 | <b>Table S1</b> | The relative amounts (%) of $\text{Ce}^{3+}$ were calculated from the areas under the curves.                                                                                                                                                                                                                                   | 6 |
| 6 | <b>Table S2</b> | The relative integral area of the O 1s peak calculated from the spectra.                                                                                                                                                                                                                                                        | 7 |
| 7 | <b>S5</b>       | (a) EPR spectra, (b) calculated g-values, and (c) zoom pattern decreased intensity of $\text{CeO}_2$ and doped $\text{CeO}_2$ , and (c) additional bands appearing in Ni-doped $\text{CeO}_2$ in the range of $G = 2.07$ to $2.15$ .                                                                                            | 7 |
| 8 | <b>S6</b>       | (a) Nyquist Plot (EIS) for NF/ $\text{CeO}_2$ and NF/1,5,10% Ni/ $\text{CeO}_2$ electrodes, measured in 1 M KOH with a 10-mV amplitude over a frequency range of $10^5$ –100 Hz and (b) Chronoamperometric curve at a constant potential of 1.6 V (vs RHE) for the NF/ $\text{CeO}_2$ and NF/10% Ni/ $\text{CeO}_2$ electrodes. | 8 |
| 9 | <b>S7</b>       | (a) Low-resolution TEM image of $\text{CeO}_2$ , and (b) the average particle size calculated from the TEM image of Ni/ $\text{CeO}_2$ .                                                                                                                                                                                        | 8 |

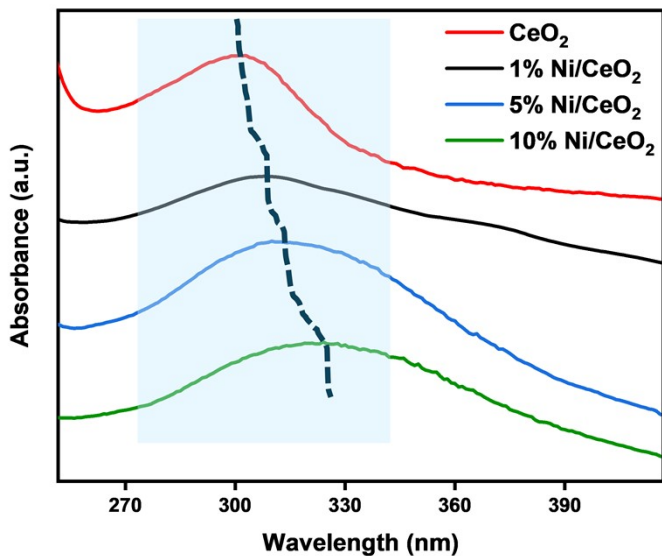

**Fig. S1** The shifting of UV-vis. absorption band of  $\text{CeO}_2$  on Ni-doping.

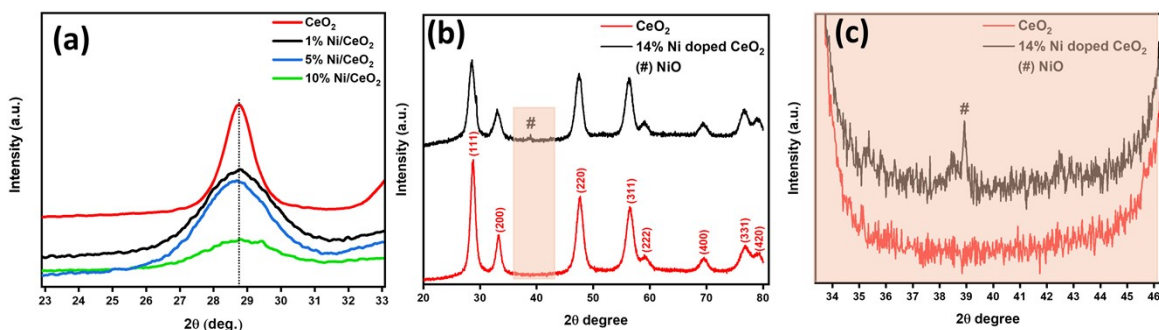

**Fig. S2** (a) Variation in intensity of peaks in XRD for  $\text{CeO}_2$  and Ni-doped  $\text{CeO}_2$ <sup>1</sup>, (b) XRD pattern of Ni-doped  $\text{CeO}_2$  with 14% Ni, and (c) zoom pattern of the peak corresponding to NiO appearing in Ni-doped  $\text{CeO}_2$  with 14% Ni.

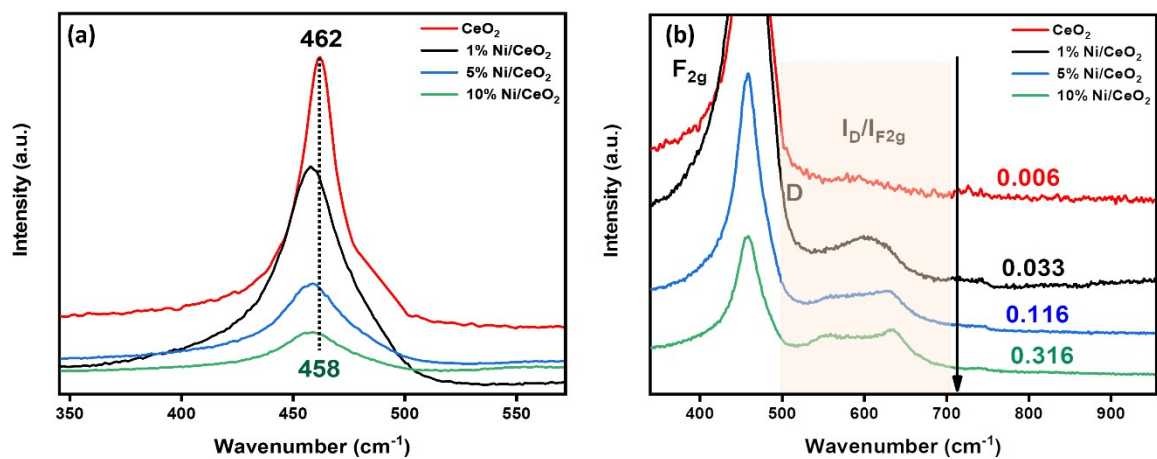

**Fig. S3** (a) Variation in intensity, broadening, and shifting of Raman peaks and (b) the bands at 610 cm<sup>-1</sup> correspond to the defect-induced mode (D) for CeO<sub>2</sub> and Ni-doped CeO<sub>2</sub>

2,3.

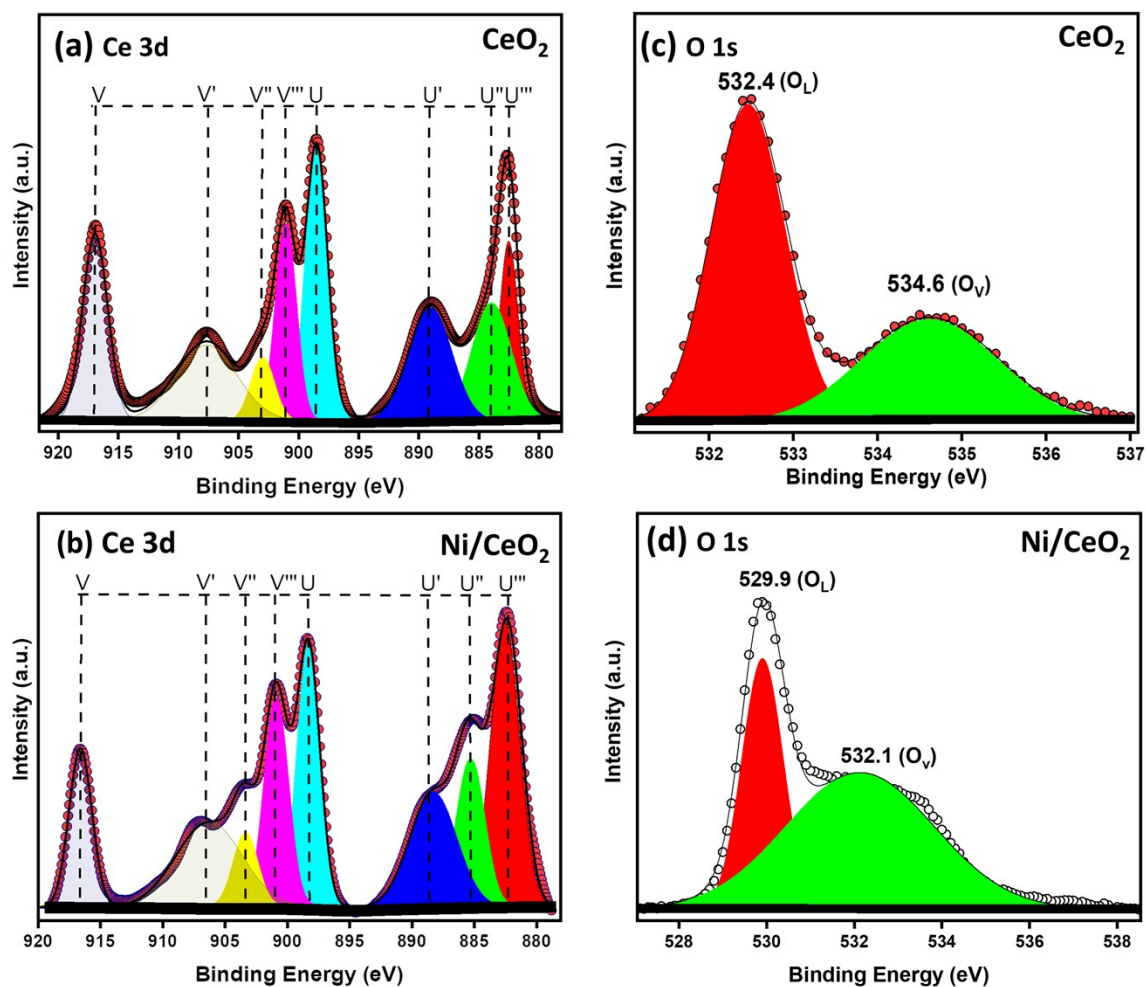

**Fig. S4** (a) and (b) the relative integral area Ce 3d, (c) and (d) the integral area of O 1s for CeO<sub>2</sub> and Ni/CeO<sub>2</sub>.

The relative concentration of Ce<sup>3+</sup> was determined by calculating the ratio of the Ce<sup>3+</sup> peak area to the total area under the Ce 3d spectrum. For the 10% Ni/CeO<sub>2</sub> sample, the Ce<sup>3+</sup> content was found to be approximately 25.17%, which is notably higher than the 14.39% observed for pure CeO<sub>2</sub>. This increase in Ce<sup>3+</sup> concentration upon Ni incorporation suggests an enhancement in oxygen vacancy formation, likely due to the strong interaction between Ni and CeO<sub>2</sub><sup>4</sup>.

The relative percentage of Ce<sup>3+</sup>, determined by integrating the area under the corresponding peaks for undoped CeO<sub>2</sub> and Ni/CeO<sub>2</sub>. The ratio of the area of peaks corresponding to Ce<sup>3+</sup>

to the area of the peaks corresponding to all peaks was used as an indicator of the concentration of oxygen vacancies associated with Ce<sup>3+</sup> sites on the catalyst surface<sup>5</sup>.

**Table S1:** The relative amounts (%) of Ce<sup>3+</sup> were calculated from the areas under the curves.

| Label | Binding energy (eV)                                                       | CeO <sub>2</sub> (Area)                     | Binding energy (eV)    | Ni/CeO <sub>2</sub> (Area)                |
|-------|---------------------------------------------------------------------------|---------------------------------------------|------------------------|-------------------------------------------|
| U'''  | 882.5                                                                     | 10102.9                                     | 882.3                  | 14440.5                                   |
| U''   | 883.9                                                                     | 13691.2                                     | 885.2                  | 7064.6                                    |
| U'    | 889                                                                       | 14450.4                                     | 888.3                  | 9387.9                                    |
| U     | 898.5                                                                     | 17959.2                                     | 898.3                  | 10627.3                                   |
| V'''  | 901                                                                       | 12020.3                                     | 900.8                  | 8463.6                                    |
| V''   | 902.9                                                                     | 4370.7                                      | 903.3                  | 3017.5                                    |
| V'    | 907.6                                                                     | 13885.6                                     | 906.3                  | 9891.2                                    |
| V     | 916.9                                                                     | 14082.3                                     | 916.6                  | 6452.5                                    |
|       | <b>Ce<sup>3+</sup></b>                                                    | <b>(10102.9+4370.7)</b><br><b>= 14473.6</b> | <b>Ce<sup>3+</sup></b> | <b>(14440.5+3017.5)</b><br><b>= 17458</b> |
|       | <b>Total Area of Ce 3d</b>                                                | <b>100562.6</b>                             |                        | 69345.1                                   |
|       | <b>% of Ce<sup>3+</sup> =</b><br>Area of Ce <sup>3+</sup> /<br>Total Area | <b>14473.6</b> /<br><b>100562.6</b>         |                        | 17458/69345.1<br><b>=25.17 %</b>          |

|  |  |         |  |  |
|--|--|---------|--|--|
|  |  | =14.39% |  |  |
|--|--|---------|--|--|

**Table S2:** The relative integral area of the O 1s peak calculated from the spectra<sup>6</sup>.

| CeO <sub>2</sub>                   |                     |            | Ni/CeO <sub>2</sub> |            |
|------------------------------------|---------------------|------------|---------------------|------------|
| Peaks assignment                   | Binding Energy (eV) | Area (A)   | Binding Energy (eV) | Area (A)   |
| O <sub>L</sub>                     | 532.4               | 7907.02    | 529.9               | 9335.4     |
| O <sub>V</sub>                     | 534.6               | 4783.60    | 532.1               | 18301.5    |
| <b>O<sub>V</sub>/O<sub>L</sub></b> |                     | <b>0.6</b> |                     | <b>1.9</b> |

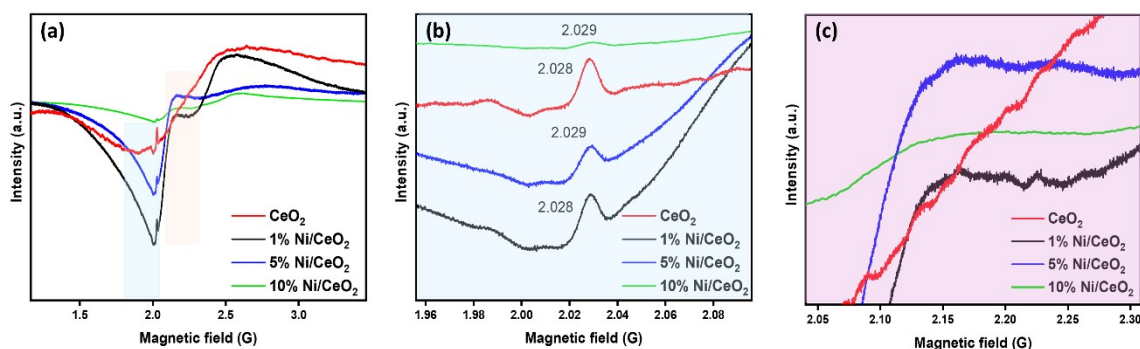

**Fig. S5** (a) EPR spectra of pristine and doped CeO<sub>2</sub>, (b) Zoomed EPR signals, from the region highlighted in blue, with their respective g-values, and (c) Zoomed EPR signals, from the region highlighted in pink (in the range of  $g = 2.07$  to  $2.15$ ) showing additional bands in Ni-doped CeO<sub>2</sub><sup>7</sup>.

The intensity of the EPR spectra decreases as the concentration of Ni increases, as shown in the enlarged EPR spectra (**Fig. S5 b**). The lowest intensity of the EPR spectra for

Ni/CeO<sub>2</sub> with 10% Ni suggests maximum oxygen vacancy defects. Further, there is an additional band with G in the range of 2.07 to 2.15 observed in Ni/CeO<sub>2</sub>, and the same is absent in pristine CeO<sub>2</sub>. This suggests the presence of Ni-related paramagnetic centres and modified defect states in doped ceria.

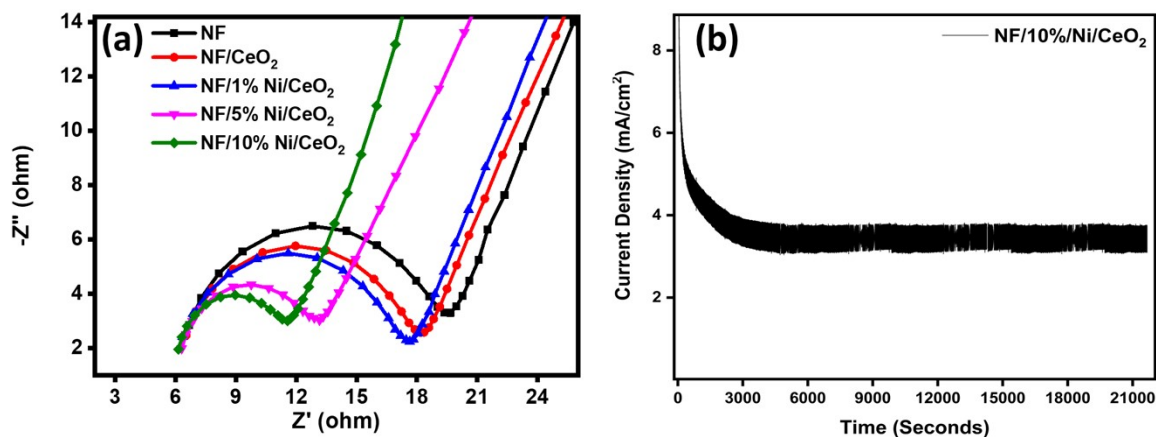

**Fig. S6** (a) Nyquist Plot (EIS) for NF/CeO<sub>2</sub> and NF/1,5,10% Ni/CeO<sub>2</sub> electrodes, measured in 1 M KOH with a 10-mV amplitude over a frequency range of 10<sup>5</sup>–10<sup>0</sup> Hz and (b) Chronoamperometric curve at a constant potential of 1.48 V (vs RHE) for the NF/10% Ni/CeO<sub>2</sub> electrodes.

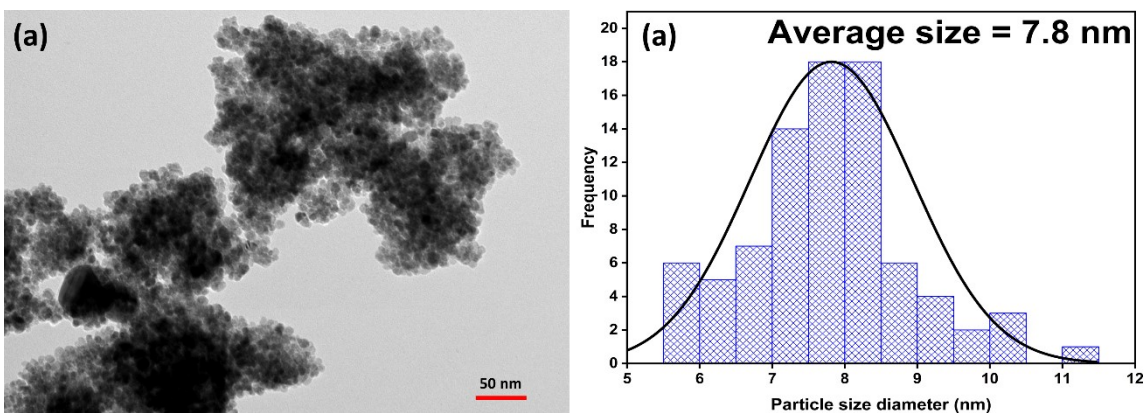

**Fig. S7** (a) Low-resolution TEM image of CeO<sub>2</sub>, and (b) the average particle size calculated from the TEM image of Ni/CeO<sub>2</sub>.

## References

---

1. Dhanka, A. K., Kohlrausch, E. C., Samantray, R., Kumar, V., Pani, B., & Agasti, N. (2025). Harnessing defects in Ag/CeO<sub>2</sub> for enhanced photocatalytic degradation of antibiotic in water: Structural characteristics, in-depth insights on mechanism, degradation pathway. *Chemical Engineering Journal Advances*, 21, 100706. <https://doi.org/10.1016/j.ceja.2025.100706>
2. Jayakumar, G., Irudayaraj, A. A., Raj, A. D., Sundaram, S. J., & Kaviyarasu, K. (2022). Electrical and magnetic properties of nanostructured Ni doped CeO<sub>2</sub> for optoelectronic applications. *Journal of Physics and Chemistry of Solids*, 160, 110369. <https://doi.org/10.1016/j.jpcs.2021.110369>
3. Jafari, S., & Shaghghi, Z. (2023). CeO<sub>2</sub>/CuO/NiO hybrid nanostructures loaded on N-doped reduced graphene oxide nanosheets as an efficient electrocatalyst for water oxidation and non-enzymatic glucose detection. *Dalton Transactions*, 52(22), 7564-7580. <https://doi.org/10.1039/D3DT00527E>
4. Dhanka, A. K., Pani, B., & Agasti, N. (2025). Defect-enriched CuO/CeO<sub>2</sub> nanostructure: in-depth structural characterization and photocatalytic performance. *RSC advances*, 15(15), 11774-11789. <https://doi.org/10.1039/D5RA00640F>
5. Soni, S., Vats, V. S., Kumar, S., Dalela, B., Mishra, M., Meena, R. S., & Dalela, S. (2018). Structural, optical and magnetic properties of Fe-doped CeO<sub>2</sub> samples probed using X-ray photoelectron spectroscopy. *Journal of Materials Science: Materials in Electronics*, 29(12), 10141-10153. <https://doi.org/10.1007/s10854-018-9060-x>
6. Dhanka, A. K., Tiwari, M., Bhartiya, P. K., Pani, B., Agasti, N., & Mishra, D. (2025). Oxygen vacancies induced low overpotentials of Ag/CeO<sub>2</sub> for electrocatalytic evolution of oxygen and hydrogen. *Materials Advances*, 6(11), 3716-3729. <https://doi.org/10.1039/D5MA00321K>
7. Wang, L., Yu, Y., He, H., Zhang, Y., Qin, X., & Wang, B. (2017). Oxygen vacancy clusters essential for the catalytic activity of CeO<sub>2</sub> nanocubes for o-xylene oxidation. *Scientific reports*, 7(1), 1-11. <https://doi.org/10.1038/s41598-017-13178-6>
